# Supplementary material for: Predicting Site Energy Usage Intensity Using Machine Learning Models
Source: MDPI journal article supplement (doi:10.3390/s23010082), 2022-12-22
Supplement: s1 [file s1]

# Supplementary Material: Predicting Site Energy Usage Intensity using Machine Learning Models

**Table S1.** Description of the dataset attributes used during our experimentations.

| Feature name       |          | Description                                              | Total values | No. missing values | Min value | Max value | Std dev | Mean    |
|--------------------|----------|----------------------------------------------------------|--------------|--------------------|-----------|-----------|---------|---------|
| Year_Factor        |          | Observation year of weather and energy usage (anonymous) | 75757        | 0                  | x         | x         | x       | x       |
| State_Factor       |          | State location of the building (anonymous)               |              |                    | x         | x         | x       | x       |
| building_class     |          | Building classification                                  |              |                    | x         | x         | x       | x       |
| facility_type      |          | Building usage type                                      |              |                    | x         | x         | x       | x       |
| floor_area         |          | Building floor area (in square feet)                     |              |                    | 9.43e02   | 6.39e06   | 2.47e5  | 1.66e05 |
| year_built         |          | Construction year of building                            | 73920        | 1837               | 1600      | 2015      | 37.05   | 1952    |
| energy_star_rating |          | Building energy star rating                              | 49048        | 26709              | 0.00      | 100.00    | 28.66   | 61.05   |
| ELEVATION          |          | Building elevation                                       | 75757        | 0                  | -6.40     | 1924.5    | 60.66   | 39.51   |
| January            | Min_temp | Building min temperature (in Fahrenheit) in January      |              |                    | -6.40     | 49        | 9.38    | 11.43   |
|                    | Avg_temp | Building avg temperature (in Fahrenheit) in January      |              |                    | 10.81     | 64.76     | 7       | 34.31   |
|                    | Max_temp | Building max temperature (in Fahrenheit) in January      |              |                    | 42.00     | 91.00     | 5.36    | 59.05   |
|                    |          |                                                          |              |                    |           |           |         |         |
| February           | Min_temp | -                                                        |              |                    | -13.00    | 48.00     | 12.58   | 11.72   |
|                    | Avg_temp | -                                                        |              |                    | 13.25     | 65.11     | 8.87    | 35.53   |
|                    | Max_temp | -                                                        |              |                    | 38.00     | 89.00     | 8.41    | 58.49   |
| March              | Min_temp | -                                                        |              |                    | -9.00     | 52.00     | 10      | 21.61   |
|                    | Avg_temp | -                                                        |              |                    | 25.85     | 69.76     | 6.57    | 44.47   |
|                    | Max_temp | -                                                        |              |                    | 53.00     | 95.00     | 7.68    | 70.90   |
| April              | Min_temp | -                                                        |              |                    | 15.00     | 52.00     | 5.58    | 32.04   |
|                    | Avg_temp | -                                                        |              |                    | 40.28     | 54.77     | 2.50    | 53.78   |
|                    | Max_temp | -                                                        |              |                    | 62.00     | 104.00    | 4.10    | 82.66   |
| May                | Min_temp | -                                                        |              |                    | 23.00     | 58.00     | 4.20    | 44.71   |
|                    | Avg_temp | -                                                        |              |                    | 46.95     | 82.11     | 2.79    | 63.74   |
|                    | Max_temp | -                                                        |              |                    | 64.00     | 112.00    | 2.86    | 88.99   |
| June               | Min_temp | -                                                        |              |                    | 30.00     | 68.00     | 3.42    | 51.13   |

|                           |                                                                   |                                                           |  |  |        |         |        |         |
|---------------------------|-------------------------------------------------------------------|-----------------------------------------------------------|--|--|--------|---------|--------|---------|
|                           | Avg_<br>temp                                                      | -                                                         |  |  | 54.10  | 89.55   | 2.86   | 71.07   |
|                           | Max_<br>temp                                                      | -                                                         |  |  | 67.00  | 119.00  | 3.60   | 91.40   |
| July                      | Min_<br>temp                                                      | -                                                         |  |  | 37.00  | 74.00   | 4.18   | 60.57   |
|                           | Avg_<br>temp                                                      | -                                                         |  |  | 54.82  | 94.44   | 4.09   | 76.60   |
|                           | Max_<br>temp                                                      | -                                                         |  |  | 65.00  | 117.00  | 4.16   | 95.54   |
| August                    | Min_<br>temp                                                      | -                                                         |  |  | 31.00  | 77.00   | 4.44   | 58.52   |
|                           | Avg_<br>temp                                                      | -                                                         |  |  | 56.69  | 94.90   | 3.82   | 75.35   |
|                           | Max_<br>temp                                                      | -                                                         |  |  | 66.00  | 116.00  | 4.14   | 92.57   |
| September                 | Min_<br>temp                                                      | -                                                         |  |  | 26.00  | 65.00   | 4.29   | 50.79   |
|                           | Avg_<br>temp                                                      | -                                                         |  |  | 53.60  | 90.12   | 3.60   | 69.59   |
|                           | Max_<br>temp                                                      | -                                                         |  |  | 64.00  | 111.00  | 5.01   | 92.17   |
| October                   | Min_<br>temp                                                      | -                                                         |  |  | 18.00  | 61.00   | 5.09   | 38.21   |
|                           | Avg_<br>temp                                                      | -                                                         |  |  | 44.69  | 80.74   | 2.64   | 58.73   |
|                           | Max_<br>temp                                                      | -                                                         |  |  | 59.00  | 108.00  | 5.58   | 81.14   |
| November                  | Min_<br>temp                                                      | -                                                         |  |  | 4.00   | 52.00   | 4      | 28.63   |
|                           | Avg_<br>temp                                                      | -                                                         |  |  | 4.09   | 67.42   | 4.09   | 48.12   |
|                           | Max_<br>temp                                                      | -                                                         |  |  | 53.00  | 96.00   | 4.37   | 71.20   |
| December                  | Min_<br>temp                                                      | Building temperature (in Fahren-<br>heit) in December     |  |  | -16.00 | 44.00   | 9.01   | 22.74   |
|                           | Avg_<br>temp                                                      | Buidling avg temperature (in Fahr-<br>enheit) in December |  |  | 23.79  | 61.79   | 5.87   | 41.63   |
|                           | Max_<br>temp                                                      | Building max temperature (in Fahr-<br>enheit) in December |  |  | 42.00  | 86.00   | 6.05   | 64.49   |
| cool-<br>ing_degree_days  | No. of degrees where the daily av-<br>erage Temp exceeds 65°F     |                                                           |  |  | 0      | 4948.00 | 391.56 | 1202.25 |
| heat-<br>ing_degree_days  | No. of degrees where the daily av-<br>erage Temp falls under 65°F |                                                           |  |  | 398.00 | 7929.00 | 824.37 | 4324.96 |
| precipita-<br>tion_inches | Annual precipitation at building<br>location (in inch)            |                                                           |  |  | 0      | 107.69  | 824.37 | 4324.96 |
| snowfall_inches           | Annual snowfall at building loca-<br>tion (in inch)               |                                                           |  |  | 0      | 127.30  | 10.59  | 42.43   |
| snow-<br>depth_inches     | Annual snow depth at building lo-<br>cation                       |                                                           |  |  | 0      | 1292.00 | 175.27 | 167.86  |

|                           |                                                              |       |       |       |        |        |        |
|---------------------------|--------------------------------------------------------------|-------|-------|-------|--------|--------|--------|
| avg_temp                  | Annual avg Temp at building location                         |       |       | 44.51 | 77.25  | 2.24   | 56.18  |
| days_below_30F            | No. of days bellow 30°F at building location                 |       |       | 0     | 170    | 27.59  | 48.76  |
| days_below_20F            | No. of days bellow 20°F at building location                 |       |       | 0     | 93.00  | 14.47  | 17.45  |
| days_below_10F            | No. of days bellow 10°F at building location                 |       |       | 0     | 59.00  | 7.071  | 4.87   |
| days_below_0F             | No. of days bellow 0°F at building location                  |       |       | 0     | 31.00  | 2.89   | 0.88   |
| days_above_80F            | No. days above 80°F at building location                     |       |       | 0     | 260    | 82.71  | 25.28  |
| days_above_90F            | No. days above 90°F at building location                     |       |       | 0     | 185    | 14.059 | 10.944 |
| days_above_100F           | No. days above 100°F at building location                    |       |       | 0     | 119    | 0.280  | 2.252  |
| days_above_110F           | No. days above 110°F at building location                    |       |       | 0     | 16     | 0.002  | 0.142  |
| direction_max_wind_speed  | Wind direction for max wind speed at building location       | 34675 | 41082 | 1.00  | 360.00 | 66.55  | 131.15 |
| direction_peak_wind_speed | Wind direction for peak wind gust speed at building location | 33946 | 41811 | 1.00  | 360.00 | 62.78  | 130.31 |
| max_wind_speed            | Max wind speed at building location                          | 34675 | 41082 | 1.00  | 360.00 | 4.20   | 6.46   |
| days_with_fog             | No. of days with fog at building location                    | 29961 | 45796 | 1.00  | 360.00 | 109.14 | 50.70  |
| site_eui                  | Energy usage intensity of site (utility bills)               | 75757 | 0     | 1.00  | 997.87 | 82.58  | 58.26  |
| id                        | Id of the building                                           |       |       | x     | x      | x      | x      |

("X") Not applicable

("- ") Similar to the above cell
